# Supplementary material for: Experiment and simulation on Zr2Fe bed for tritium capturing
Source: Royal Society of Chemistry journal article supplement (doi:10.1039/c8ra08784a), 2019-01-01
Supplement: c8ra08784a1.pdf [file c8ra08784a1.pdf]

## Experiment and Simulation on Zr<sub>2</sub>Fe Bed for Tritium Capturing

Song Jiangfeng,<sup>a,b</sup> Wang Jingchuan\*<sup>b</sup>, Jiang Fei<sup>b</sup>, Li Peilong<sup>b</sup>, Zhu Zhenghe<sup>a</sup>, and Meng Daqiao<sup>a,b</sup>

---

<sup>a</sup> Institute of Atomic and Molecular Physics, Sichuan University, Chengdu 610065, China

<sup>b</sup> Institute of Materials, Chinese Academy of Engineering Physics, Jianguoyou 621908, Mianyang, China

```
function PDE1Dd_pdepe

% using pdepe() in MATLAB software to solve the one-dimension
differential equation

global D A B

global ua ub v Rp fi

D=1.63*10^-4;           % dispersion coefficient/ m2/s

dp=150*10^-6;          % mean Zr2Fe particle/ m

ua =1.12;              %initial concentration/ mol/m3

ub = 0;                % exhaust gas concentration/ mol/m3

m = 0;

a = 0;

b = 0.1;               % bed length/ m

fi=0.014;             % bed diameter/m

v=0.02;               %gas velocity/ m/s

t0 = 0.1;

tf = 400;

x = linspace(a,b,100);

t = linspace(t0,tf,100);
```

```

k=0.85; % coefficient constant of reaction

to=3000; % time at the 87.3% accounts

tao=1-(1-k*sqrt(t/to)).^3;

dtao=3*k/to*(1-k*(t/to).^(1/2)).^2.*(t/to).^(-1/2);
%the fitted kinetics equation

epsilon=0.5; % the bed porosity

rou=6900; % applied Zr2Fe density/ kg/m3

Rp=dtao*rou*epsilon.*v*3.14*(fi/2).^2/2;

sol = pdepe(m,@PDEfun,@ICfun,@BCfun,x,t);

% Extract the first solution component as u. This is not necessary
% for a single equation, but makes a point about the form of the
output.

u = sol(:,:,1);

% surface plot of the solution

figure;

surf(x,t,u);

title('Numerical solution computed with mesh points.');
```

xlabel('Length x/m');

ylabel('Time t/day');

```

% solution profile at t=end

figure;

plot(x,u(20,:),x,u(40,:),x,u(55,:));

title('Solutions at different time.');
```

```

legend('concentration profile',0);

xlabel('Distance x/m');

ylabel('u(x,t)');

% solution profile at x=70

figure;

plot(t,u(:,80),'red*');

title('Solutions at different locations.');
```

```

legend('concentration profile',0);

xlabel('Distance t/day');

ylabel('u(t,0.08)');
```

```

% -----
```

```

function [c,f,s] = PDEfun(x,t,u,DuDx)
```

```

global D v Rp
```

```

c = 1/D;
```

```

f = DuDx;
```

```

s = -v/D*DuDx-1/D*Rp;
```

```

% -----
```

```

function u0 = ICfun(x)
```

```

u0 = 0;    % degree centigrade
```

```

% -----
```

```
function [p1,q1,pr,qr] = BCfun(xl,ul,xr,ur,t)
```

```
global ua ub v D
```

```
p1 = ul-ua;
```

```
q1 = 0;
```

```
pr = ur-ub;
```

```
qr = 0;
```
